# Supplementary material for: Promoting the Electrocatalytic Ethanol Oxidation Activity of Pt by Alloying with Cu
Source: MDPI journal article supplement (doi:10.3390/catal12121562), 2022-12-02
Supplement: s1 [file s1]

# Promoting the Electrocatalytic Ethanol Oxidation Activity of Pt by Alloying with Cu

Di Liu<sup>1</sup>, Hui-Zi Huang<sup>1</sup>, Zhejiaji Zhu<sup>1</sup>, Jiani Li<sup>1</sup>, Li-Wei Chen<sup>1</sup>, Xiao-Ting Jing<sup>1</sup>, and An-Xiang Yin<sup>1\*</sup>

Ministry of Education Key Laboratory of Cluster Science, Beijing Key Laboratory of Photoelectronic/Electrophotonic Conversion Materials, Advanced Technology Research Institute (Jinan), School of Chemistry and Chemical Engineering, Beijing Institute of Technology, Beijing 100081, China  
\* Correspondence: yin@bit.edu.cn.

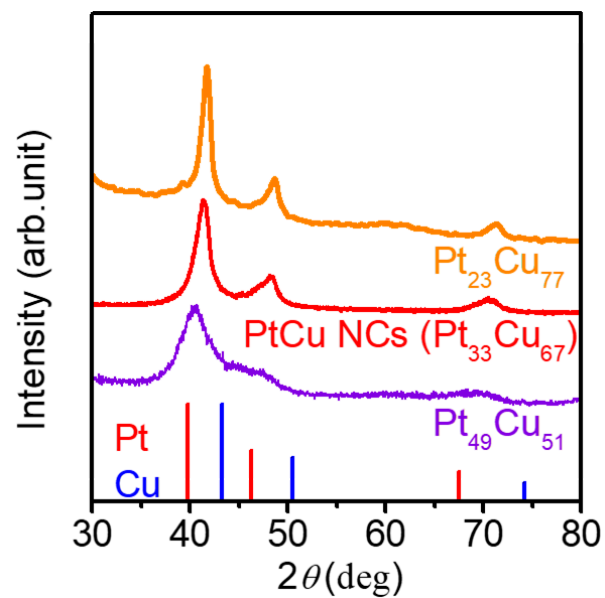

**Figure S1.** XRD patterns of the  $\text{Pt}_{49}\text{Cu}_{51}$ , PtCu NCs ( $\text{Pt}_{33}\text{Cu}_{67}$ ), and (c)  $\text{Pt}_{23}\text{Cu}_{77}$ .

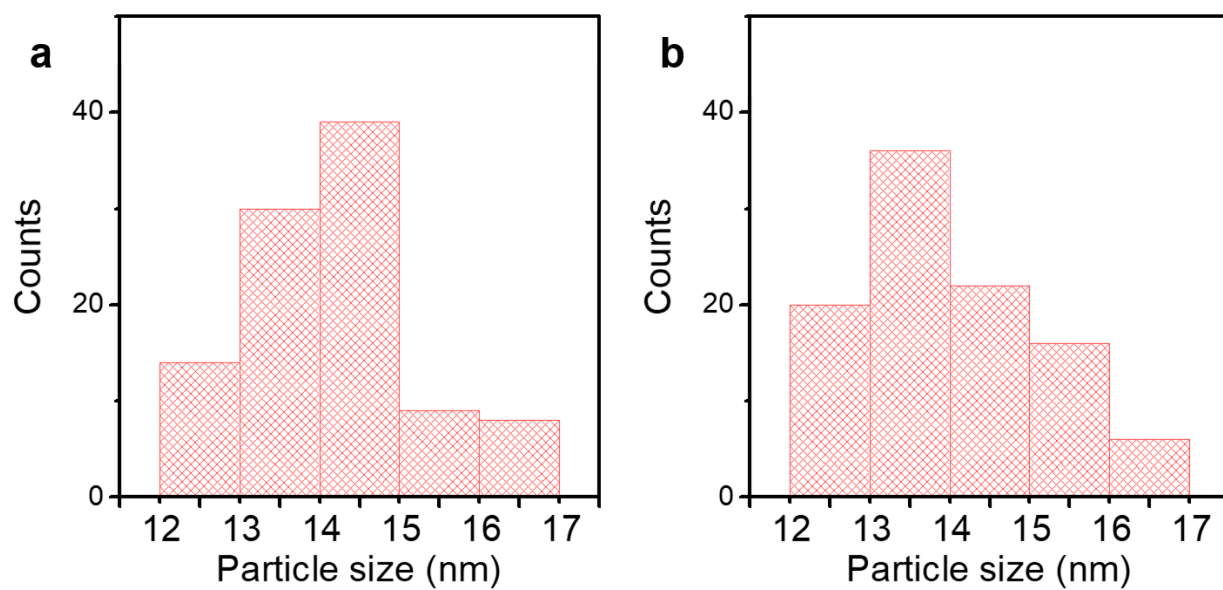

**Figure S2.** The histograms of size distributions of at least 100 particles. (a) PtCu NCs, (b) PtCu NPs.

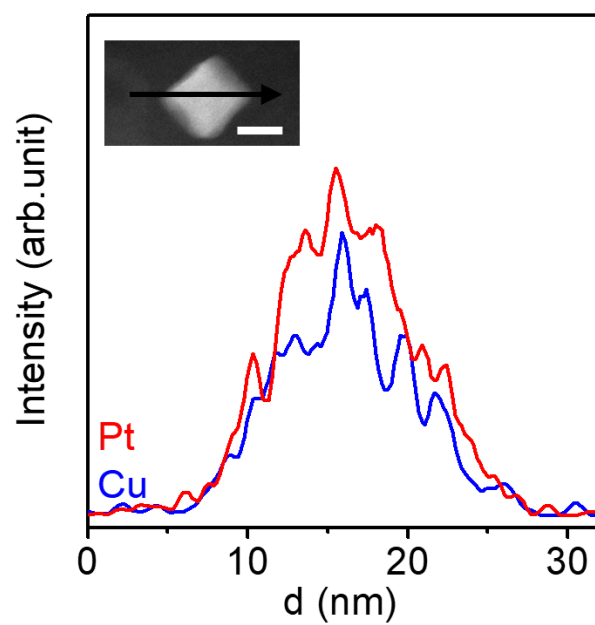

**Figure S3.** Line scanning profile of PtCu NC. Scale bar: 10 nm.

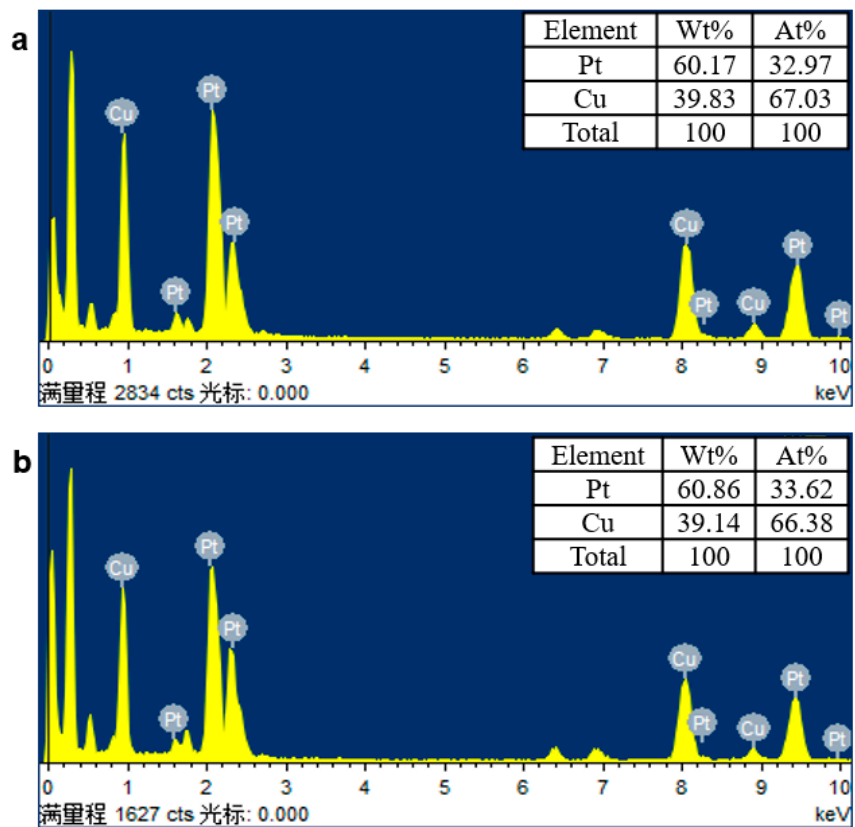

**Figure S4.** Elemental analysis by EDS. (a) PtCu NCs (b) PtCu NPs.

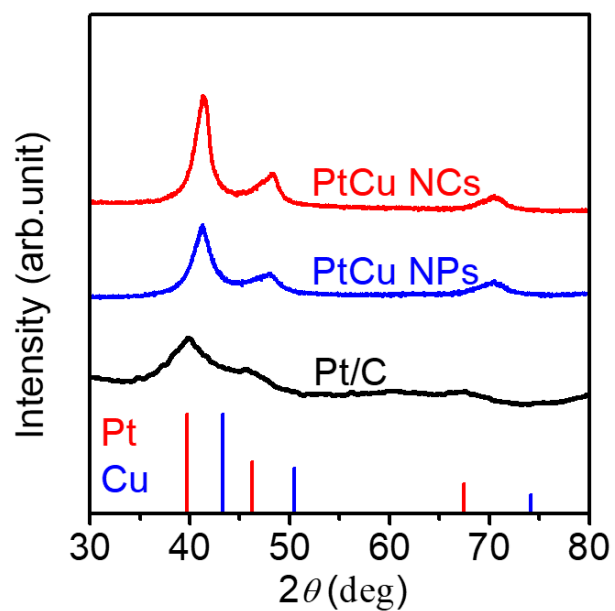

**Figure S5.** XRD patterns of the commercial Pt/C, PtCu NPs, and PtCu NCs.

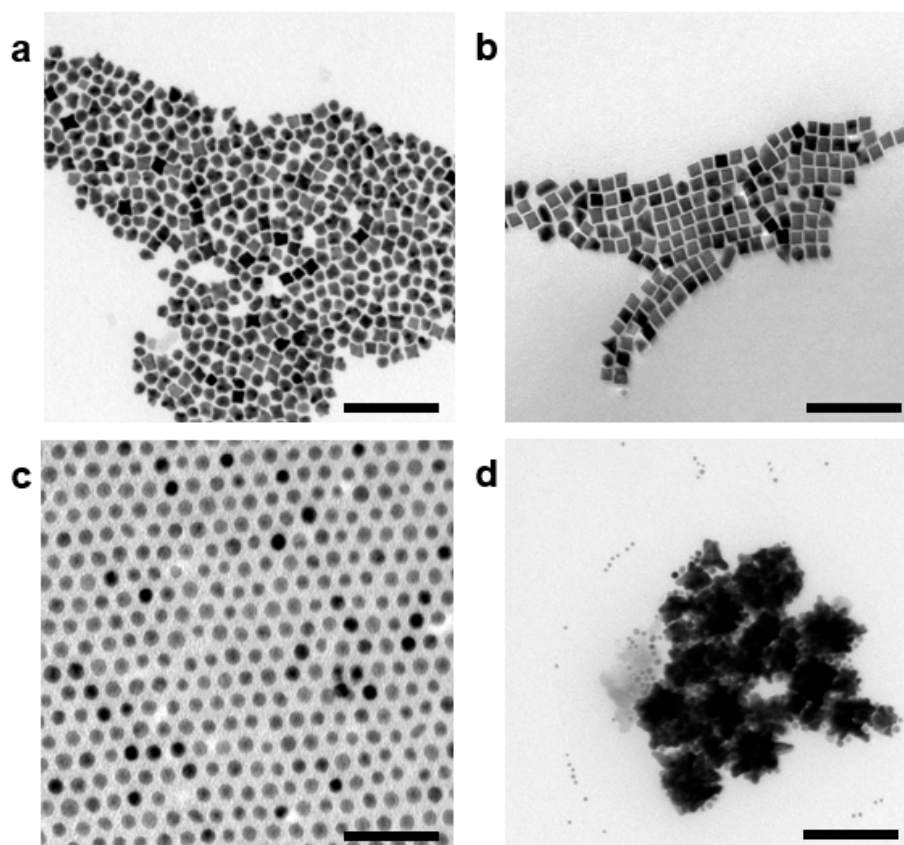

**Figure S6.** TEM images of the PtCu nanoparticles synthesized by using different amounts of CTAB. (a) 0.16 mmol, (b) 0.08 mmol, (c) 0.04 mmol, (d) 0.00 mmol. Scale bars: (a–d) 100 nm.

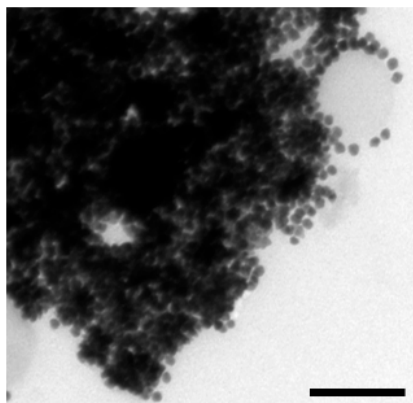

**Figure S7.** TEM image of the PtCu nanoparticles synthesized by using 0.08 mmol KBr. Scale bar: 100 nm.



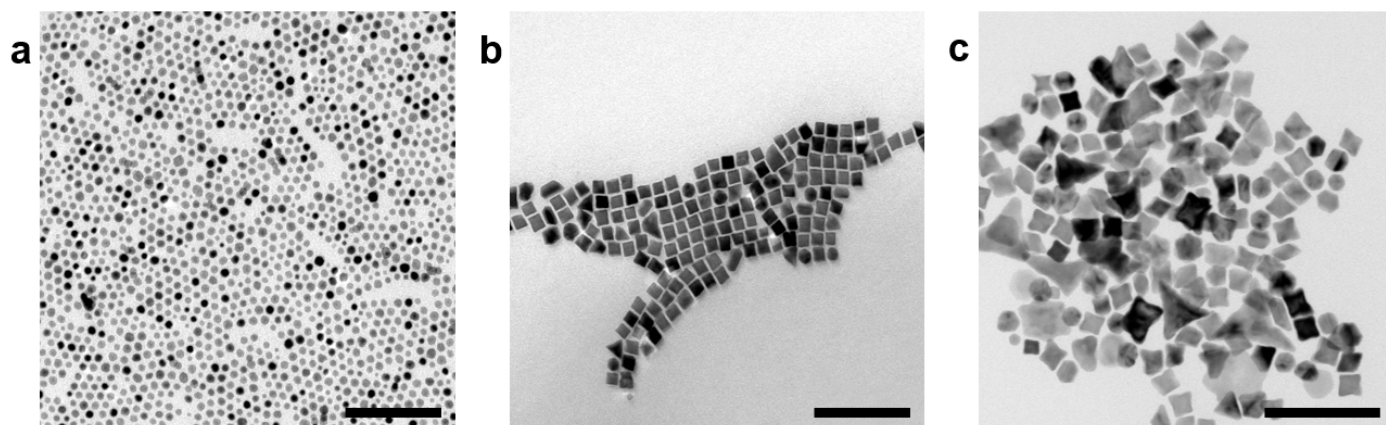

**Figure S8.** TEM images of the PtCu nanocrystals with different Pt/Cu atomic ratios. (a)  $\text{Pt}_{49}\text{Cu}_{51}$ , (b) PtCu NCs ( $\text{Pt}_{33}\text{Cu}_{67}$ ), and (c)  $\text{Pt}_{23}\text{Cu}_{77}$ . Scale bars: (a–c) 100 nm.

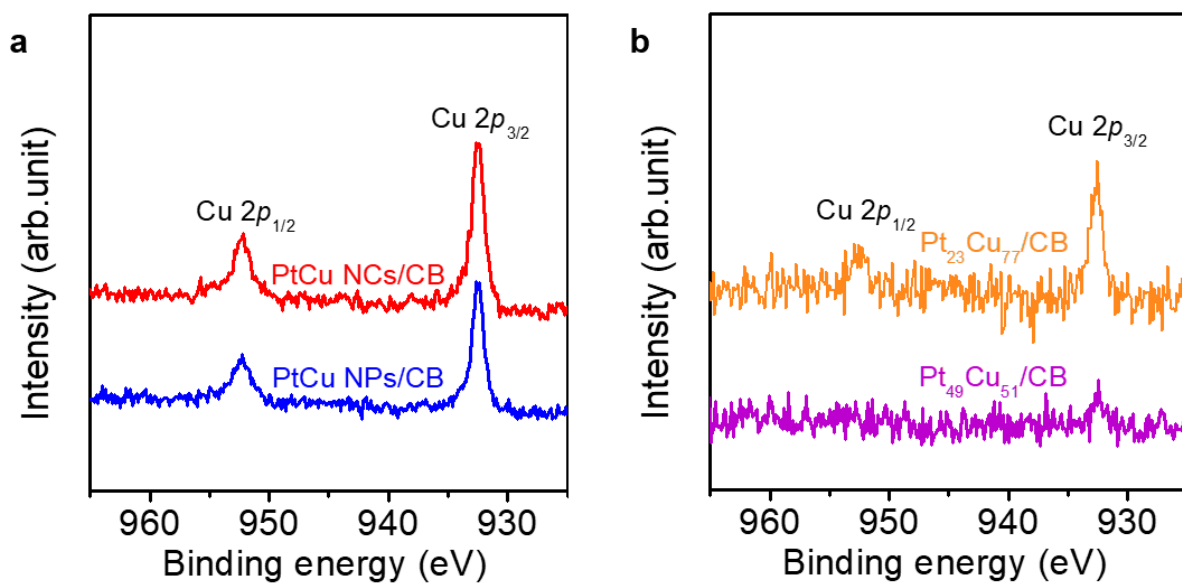

**Figure S9.** (a) Cu 2p XPS spectra of PtCu NCs/CB and PtCu NPs/CB. (b) Cu 2p XPS spectra of  $\text{Pt}_{49}\text{Cu}_{51}/\text{CB}$  and  $\text{Pt}_{23}\text{Cu}_{77}/\text{CB}$ .

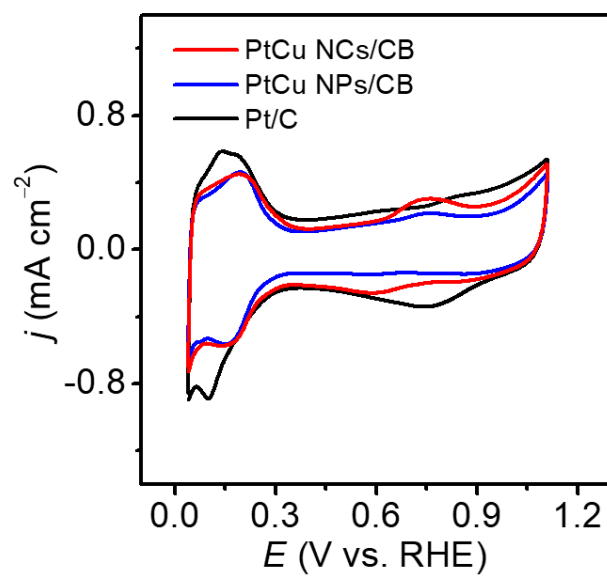

**Figure S10.** CV curves of PtCu NCs/CB, PtCu NPs/CB, and commercial Pt/C catalysts in  $\text{N}_2$ -saturated 0.1 M  $\text{HClO}_4$  at a scan rate of  $50 \text{ mV s}^{-1}$ .

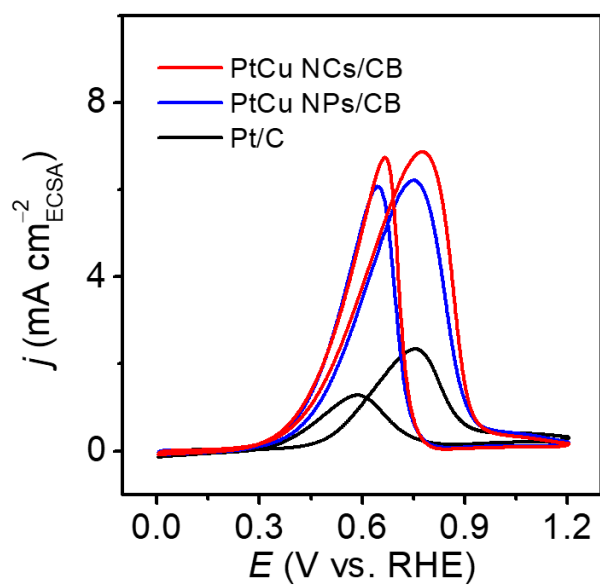

**Figure S11.** ECSA-normalized CV curves of the EOR on PtCu NCs/CB, PtCu NPs/CB and commercial Pt/C in the mixed electrolyte of 1.0 M KOH and 1.0 M C<sub>2</sub>H<sub>5</sub>OH at a scan rate of 50 mV s<sup>-1</sup>.

**Table S1.** Summary of the ECSAs, loading, mass activities and specific activities at 0.75 V vs. RHE for Pt-based catalysts.

| Catalysts                             | ECSA<br>(cm <sup>2</sup> ) | Loading<br>(μg <sub>Pt</sub> cm <sup>-2</sup> ) | Specific activity<br>@0.75 V vs. RHE<br>(mA cm <sup>-2</sup> (ECSA)) | Mass activity<br>@0.75 V vs. RHE<br>(A mg <sub>Pt</sub> <sup>-1</sup> ) |
|---------------------------------------|----------------------------|-------------------------------------------------|----------------------------------------------------------------------|-------------------------------------------------------------------------|
| PtCu NCs/CB                           | 1.34                       | 9.3                                             | 6.75                                                                 | 4.96                                                                    |
| PtCu NPs/CB                           | 1.12                       | 10.8                                            | 6.22                                                                 | 3.26                                                                    |
| Pt <sub>49</sub> Cu <sub>51</sub> /CB | /                          | 12.0                                            | /                                                                    | 2.70                                                                    |
| Pt <sub>23</sub> Cu <sub>77</sub> /CB | /                          | 10.9                                            | /                                                                    | 3.36                                                                    |
| Pt/C                                  | 1.41                       | 10.2                                            | 2.34                                                                 | 1.67                                                                    |

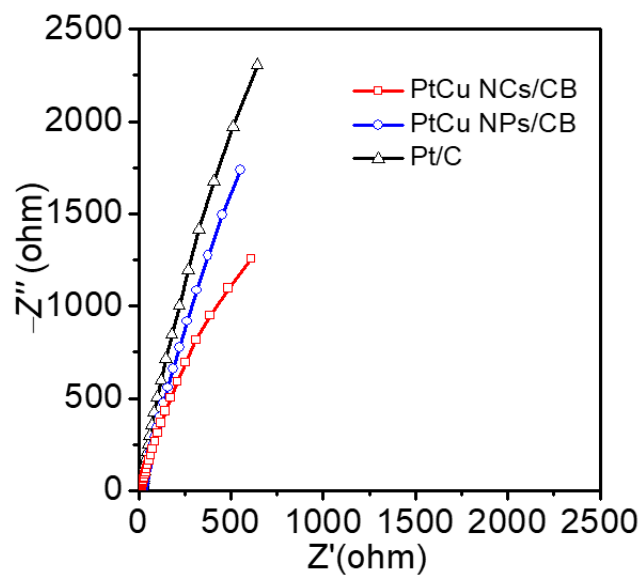

**Figure S12.** Nyquist plots measured at 0.75 V vs. RHE in the mixture of 1.0 M KOH and 1.0 M  $\text{C}_2\text{H}_5\text{OH}$ .

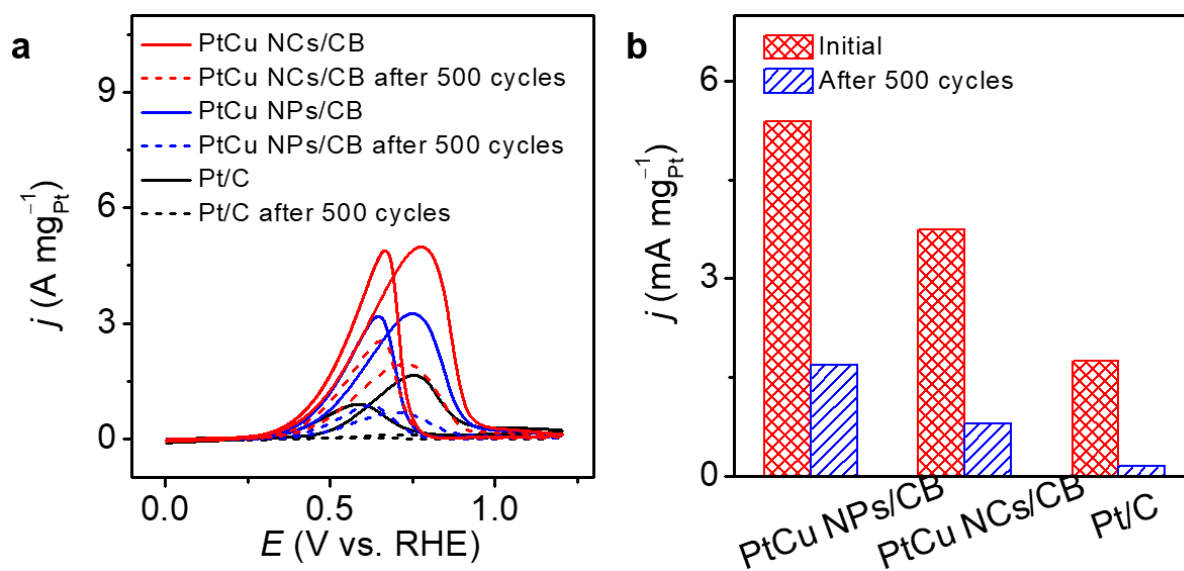

**Figure S13.** Mass activities of PtCu NCs/CB, PtCu NPs/CB and commercial Pt/C before and after 500 cycles in 1.0 M KOH and 1.0 M C<sub>2</sub>H<sub>5</sub>OH at a scan rate of 50 mV s<sup>-1</sup>.

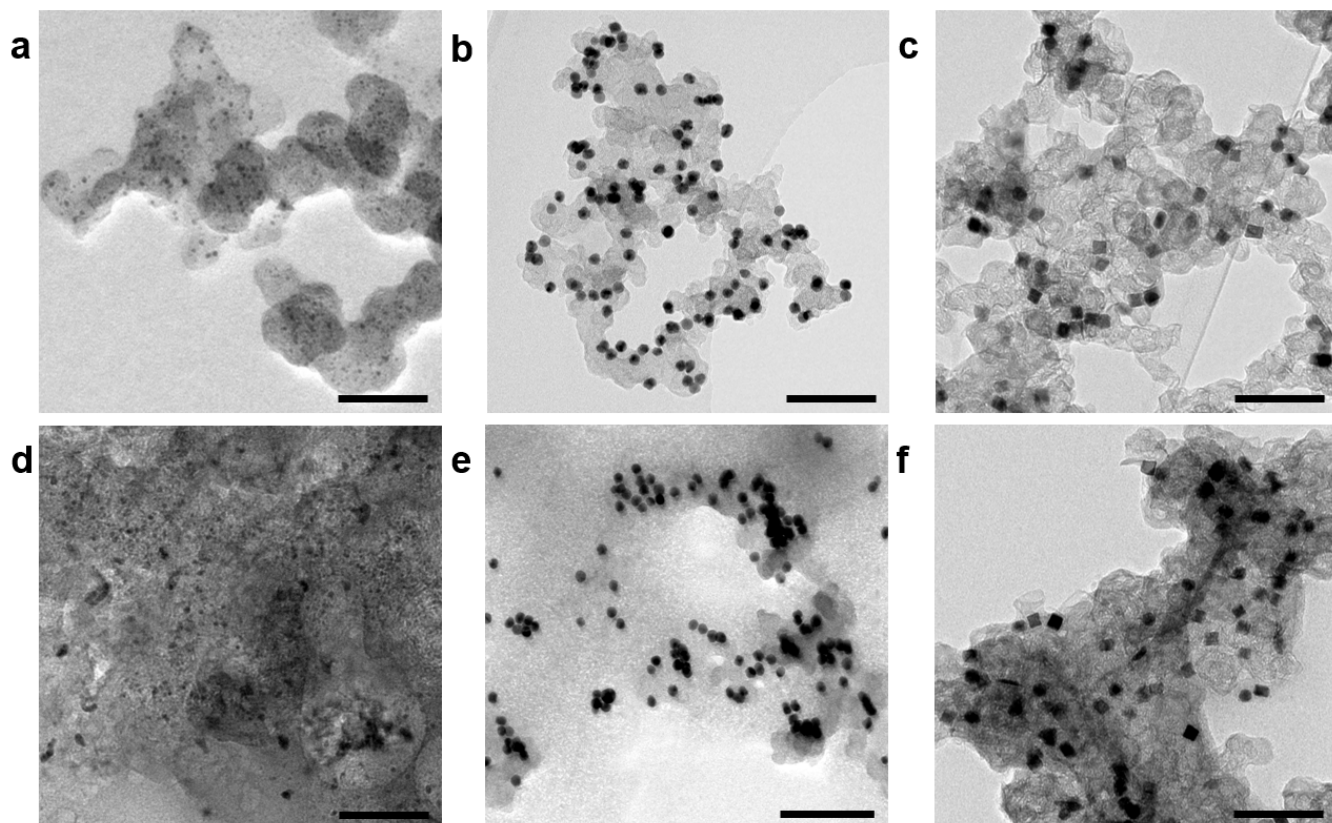

**Figure S14.** TEM images of (a) Pt/C, (b) PtCu NPs/CB, and (c) PtCu NCs/CB before electrochemical measurements. TEM images of (d) Pt/C, (e) PtCu NPs/CB, and (f) PtCu NCs/CB after 500 cycles in 1.0 M KOH and 1.0 M C<sub>2</sub>H<sub>5</sub>OH at a scan rate of 50 mV s<sup>-1</sup>. Scale bars: (a, d) 50 nm, (b, c, e, f) 100 nm.



**Table S2.** EOR electrocatalytic activities of Pt-based catalysts in alkaline media.

| Catalyst                      | Electrolyte                      | Mass activities<br>(A mg <sub>Pt</sub> <sup>-1</sup> ) | Reference        |
|-------------------------------|----------------------------------|--------------------------------------------------------|------------------|
| <b>PtCu NCs/CB</b>            | <b>1.0 M KOH + 1.0 M ethanol</b> | <b>4.96</b>                                            | <b>This work</b> |
| PtCu/Cu <sub>2-x</sub> Se NWs | 1.0 M KOH + 1.0 M ethanol        | 5.03                                                   | 1                |
| SA Ni-Pt NWs                  | 1.0 M KOH + 1.0 M ethanol        | 5.60                                                   | 2                |
| PtRhNi octahedrons            | 1.0 M KOH + 1.0 M ethanol        | 3.39                                                   | 3                |
| PtRhCu nanocubes              | 1.0 M KOH + 1.0 M ethanol        | 4.09                                                   | 4                |
| Pt NPs/CeO <sub>2</sub>       | 1.0 M KOH + 1.0 M ethanol        | 8.67                                                   | 5                |
| PtNi multicubes               | 1.0 M KOH + 1.0 M ethanol        | 2.86                                                   | 6                |
| PtFePd NWs                    | 1.0 M KOH + 1.0 M ethanol        | 4.96                                                   | 7                |
| PtRh nanodendrites            | 1.0 M NaOH + 1.0 M ethanol       | 0.46                                                   | 8                |
| 4H Au@PtCu nanoribbons        | 1.0 M KOH + 1.0 M ethanol        | 4.22                                                   | 9                |
| PtBi nanoplates               | 1.0M NaOH + 1.0M ethanol         | 5.95                                                   | 10               |
| PtRhNi nanoassemblies         | 1.0 M NaOH + 1.0 M ethanol       | 1.39                                                   | 11               |
| PtPdRu nanodendrites          | 1.0 M NaOH + 1.0 M ethanol       | 1.96                                                   | 12               |
| PtMo/C                        | 0.5 M KOH + 0.5 M ethanol        | 1.00                                                   | 13               |
| PtCu NPs                      | 0.5 M KOH + 0.5 M ethanol        | 2.33                                                   | 14               |
| PdPtAg Nanosheets             | 0.1 M KOH + 0.5 M ethanol        | 1.31                                                   | 15               |

## Reference

1. Peng, H. C.; Ren, J.; Wang, Y. C.; Xiong, Y.; Wang, Q. C.; Li, Q.; Zhao, X.; Zhan, L. S.; Zheng, L. R.; Tang, Y. G.; Lei, Y. P. One-stone, two birds: Alloying effect and surface defects induced by Pt on Cu<sub>2-x</sub>Se nanowires to boost C–C bond cleavage for electrocatalytic ethanol oxidation. *Nano Energy* **2021**, *88*, 106307.
2. Li, M. F.; Duanmu, K.; Wan, C. Z.; Cheng, T.; Zhang, L.; Dai, S.; Chen, W. X.; Zhao, Z. P.; Li, P.; Fei, H. L.; Zhu, Y. M.; Yu, R.; Luo, J.; Zang, K. T.; Lin, Z. Y.; Ding, M. N.; Huang, J.; Sun, H. T.; Guo, J. H.; Pan, X. Q.; Goddard, W. A.; Sautet, P.; Huang, Y.; Duan, X. F. Single-atom tailoring of platinum nanocatalysts for high-performance multifunctional electrocatalysis. *Nat. Catal.* **2019**, *2*, 495–503.
3. Erini, N.; Beermann, V.; Gocyla, M.; Gliech, M.; Heggen, M.; Dunin-Borkowski, R. E.; Strasser, P. The Effect of surface site ensembles on the activity and selectivity of ethanol electrooxidation by octahedral PtNiRh nanoparticles. *Angew. Chem., Int. Ed.* **2017**, *56*, 6533–6538.
4. Han, S. H.; Liu, H. M.; Chen, P.; Jiang, J. X.; Chen, Y. Porous trimetallic PtRhCu cubic nanoboxes for ethanol electrooxidation. *Adv. Energy Mater.* **2018**, *8*, 1801326.
5. Chen, L. G.; Liang, X.; Li, X. T.; Pei, J. J.; Lin, H.; Jia, D. Z.; Chen, W. X.; Wang, D. S.; Li, Y. D. Promoting electrocatalytic methanol oxidation of platinum nanoparticles by cerium modification. *Nano Energy* **2020**, *73*, 104784.
6. Wu, F. X.; Eid, K.; Abdullah, A. M.; Niu, W. X.; Wang, C.; Lan, Y. X.; Elzatahry, A. A.; Xu, G. B. Unveiling one-pot template-free fabrication of exquisite multidimensional PtNi multicube nanoarchitectonics for the efficient electrochemical oxidation of ethanol and methanol with a great tolerance for CO. *ACS Appl. Mater. Interfaces* **2020**, *12*, 31309–31318.
7. Zhang, Y. P.; Gao, F.; Wang, C. Q.; Shiraishi, Y.; Du, Y. K. Engineering spiny PtFePd@PtFe/Pt core@multishell nanowires with enhanced performance for alcohol electrooxidation. *ACS Appl. Mater. Interfaces* **2019**, *11*, 30880–30886.
8. Bai, J.; Xiao, X.; Xue, Y. Y.; Jiang, J. X.; Zeng, J. H.; Li, X. F.; Chen, Y. Bimetallic platinum–rhodium alloy nanodendrites as highly active electrocatalyst for the ethanol oxidation reaction. *ACS Appl. Mater. Interfaces* **2018**, *10*, 19755–19763.
9. Wang, J.; Zhang, J.; Liu, G. G.; Ling, C. Y.; Chen, B.; Huang, J. T.; Liu, X. Z.; Li, B.; Wang, A. L.; Hu, Z. N.; Zhou, M.; Chen, Y.; Cheng, H. F.; Liu, J. W.; Fan, Z. X.; Yang, N. L.; Tan, C. L.; Gu, L.; Wang, J. L.; Zhang, H. Crystal phase-controlled growth of PtCu and PtCo alloys on 4H Au nanoribbons for electrocatalytic ethanol oxidation reaction. *Nano Res.* **2020**, *13*, 1970–1975.
10. Yuan, X. L.; Jiang, X. J.; Cao, M. H.; Chen, L.; Nie, K. Q.; Zhang, Y.; Xu, Y.; Sun, X. H.; Li, Y. G.; Zhang, Q. Intermetallic PtBi core/ultrathin Pt shell nanoplates for efficient and stable methanol and ethanol electro-oxidation. *Nano Res.* **2019**, *12*, 429–436.
11. Liu, H. M.; Li, J. H.; Wang, L. J.; Tang, Y. W.; Xia, B. Y.; Chen, Y. Trimetallic PtRhNi alloy nanoassemblies as highly active electrocatalyst for ethanol electrooxidation. *Nano Res* **2017**, *10*, 3324–3332.
12. Eid, K.; Ahmad, Y. H.; Yu, H. J.; Li, Y. H.; Li, X. N.; AlQaradawi, S. Y.; Wang, H. J.; Wang, L. Rational one-step synthesis of porous PtPdRu nanodendrites for ethanol oxidation reaction with a superior tolerance for CO-poisoning. *Nanoscale* **2017**, *9*, 18881–18889.
13. Liu, T. Y.; Wang, K.; Yuan, Q.; Shen, Z. B.; Wang, Y.; Zhang, Q. H.; Wang, X. Monodispersed sub-5.0 nm PtCu nanoalloys as enhanced bifunctional electrocatalysts for oxygen reduction reaction and ethanol oxidation reaction. *Nanoscale* **2017**, *9*, 2963–2968.
14. Pech-Rodríguez, W. J.; González-Quijano, D.; Vargas-Gutiérrez, G.; Morais, C.; Napporn, T. W.; Rodríguez-Varela, F. J. Electrochemical and in situ FTIR study of the ethanol oxidation reaction on PtMo/C nanomaterials in alkaline media. *Appl. Catal. B Environ.* **2017**, *203*, 654–662.
15. Hong, J. W.; Kim, Y.; Wi, D. H.; Lee, S.; Lee, S. U.; Lee, Y. W.; Choi, S. I.; Han, S. W. Ultrathin free-standing ternary-alloy nanosheets. *Angew. Chem. Int. Ed.* **2016**, *55*, 2753–2758.
